# Supplementary material for: Ewing sarcoma family of tumors-derived small extracellular vesicle proteomics identify potential clinical biomarkers
Source: PubMed Central journal article supplement (PMC7415402; doi:10.18632/oncotarget.27678), 2020-08-04
Supplement: oncotarget-11-2995-s001.pdf [file oncotarget-11-2995-s001.pdf]

## Ewing sarcoma family of tumors-derived small extracellular vesicle proteomics identify potential clinical biomarkers

### SUPPLEMENTARY MATERIALS

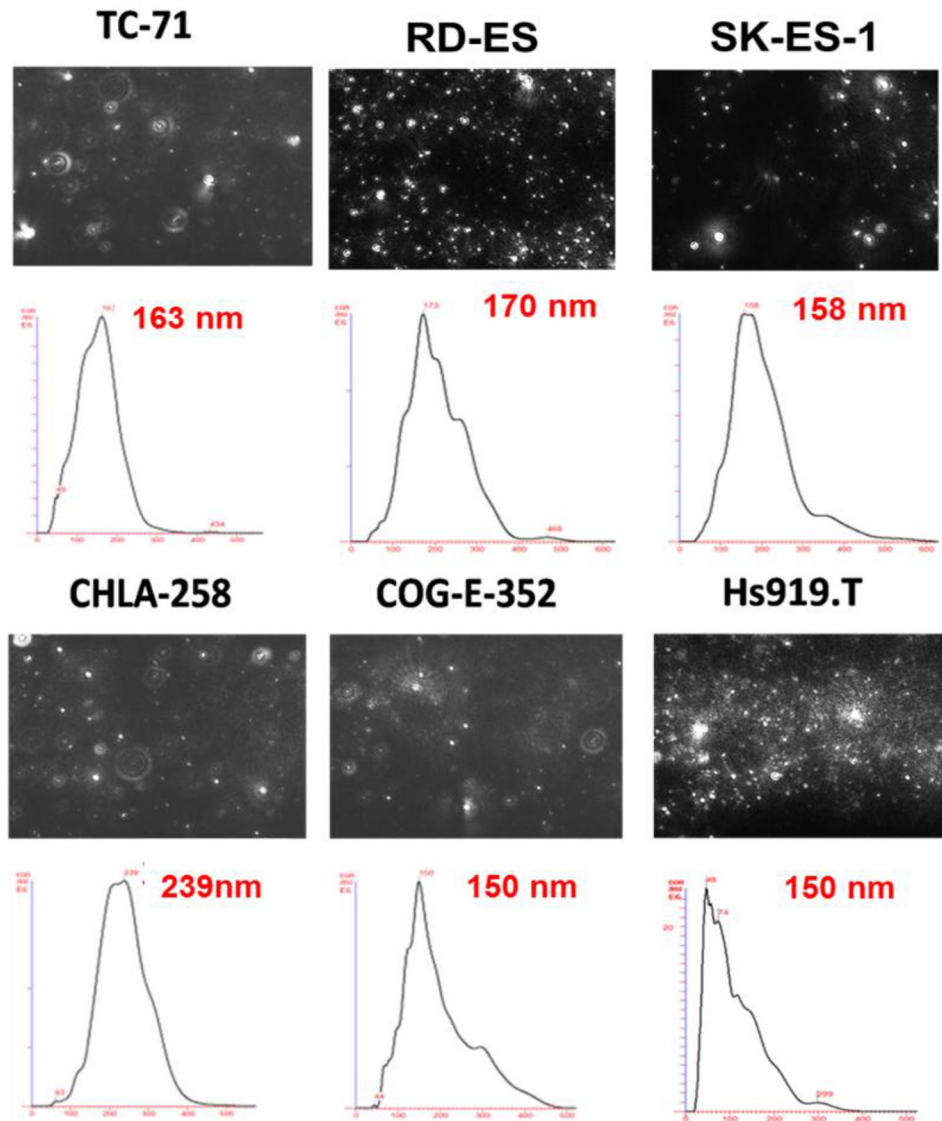

**Supplementary Figure 1: Size distribution analysis of microvesicles.** The size and number of microvesicles isolated from ESFT cell lines as determined by NTA analysis.

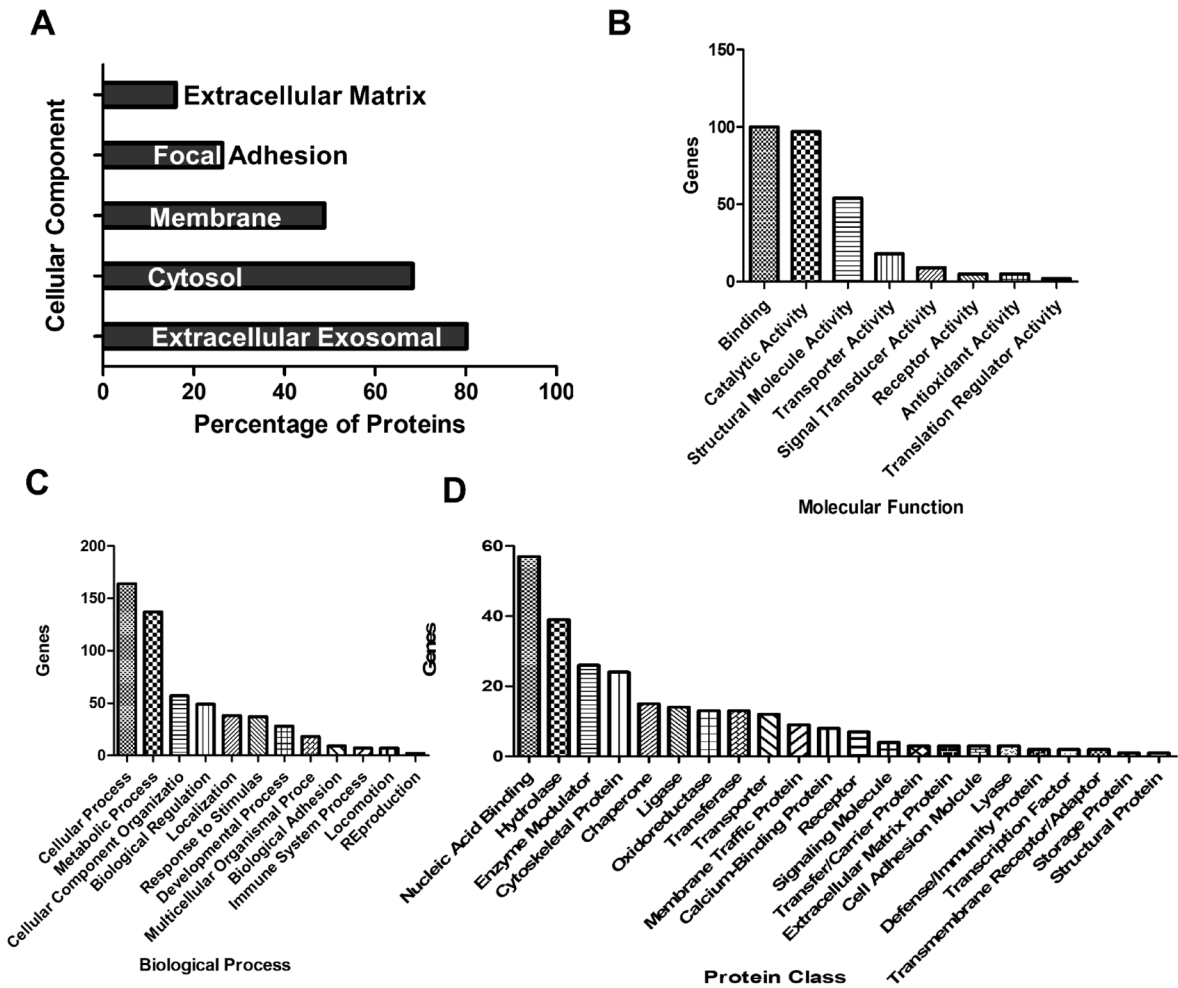

**Supplementary Figure 2: Pathway analysis of ESFT sEV core proteome.** (A) FunRich analysis of common ESFT sEV proteins. (B–D) PANTHER (Protein Analysis Through Evolutionary Relationships) analysis results of molecular functions (B), biological functions (C), and protein classes of ESFT sEVs (D).

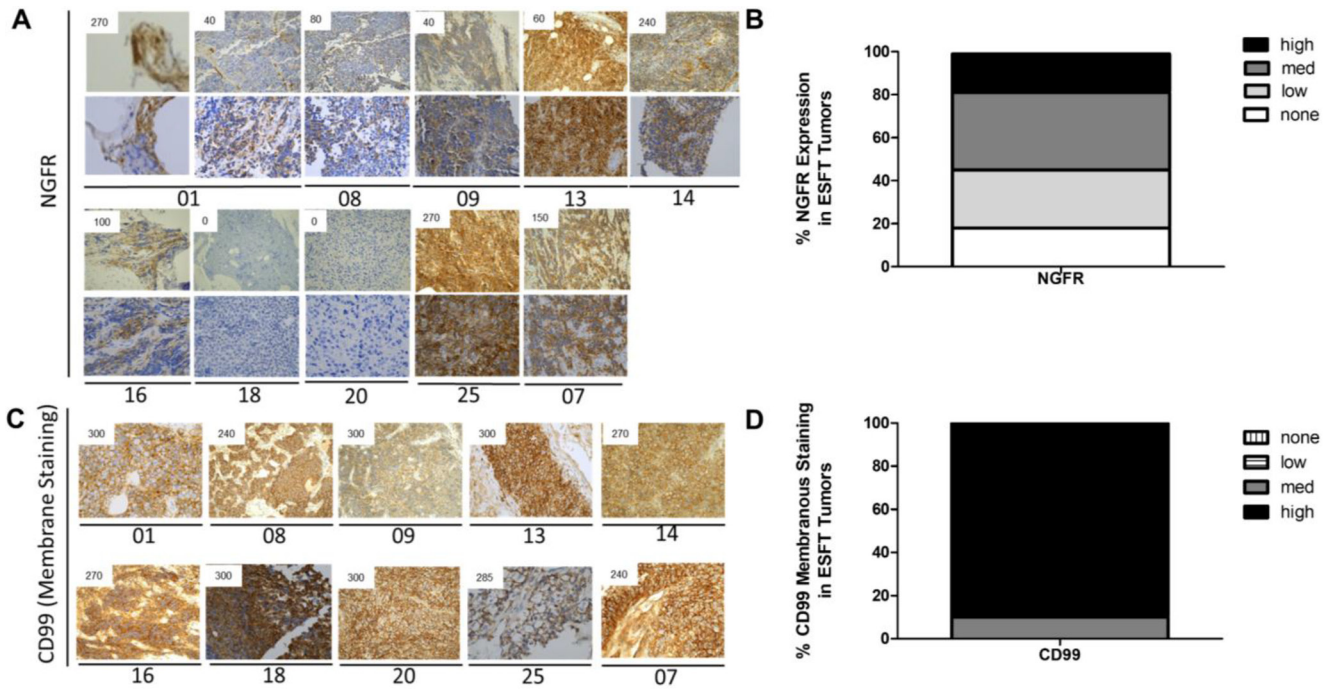

**Supplementary Figure 3: IHC analysis of CD99 and HINT1 in ESFT tissue samples. (A–B) NGFR staining. (C–D) CD99 staining.**

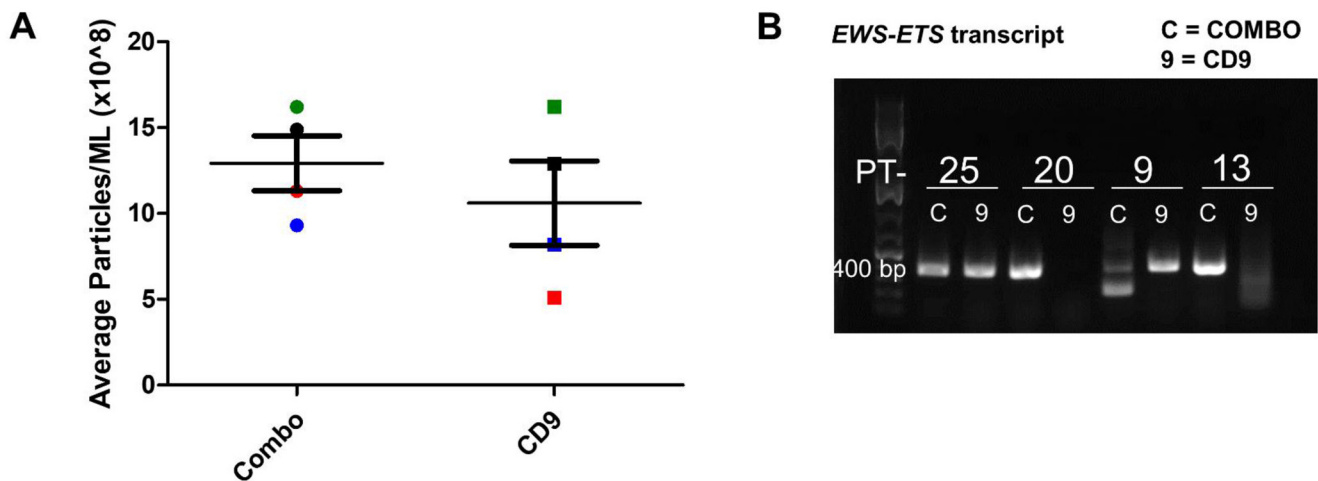

**Supplementary Figure 4: Comparison of ESFT sEVs isolated through COMBO or CD9 immun-isolation in 250  $\mu$ L of pediatric clinical plasma samples. (A) The average number of sEVs isolated demonstrated no significant variation depending on technique. (B) DNA gel electrophoresis of EWS-ETS amplicon (~400 bp) illustrates the presence of the transcript in all of the patient samples vs. 50% of the samples isolated using the common EV tetraspanin CD9 alone.**

**Supplementary Table 1: Cell line information**

| Cell Line | Age (years) | Diagnosis              | t(11;22) | Fusion Type | Phase of Therapy | Clinical Status     |
|-----------|-------------|------------------------|----------|-------------|------------------|---------------------|
| TC-71     | 22          | Ewing Sarcoma          | +        | Type I      | Post-therapy     | Progressive Disease |
| RD-ES     | 19          | Ewing Sarcoma          | +        | Type II     | -                | -                   |
| SK-ES-1   | 18          | Ewing Sarcoma          | +        | Type II     | -                | -                   |
| CHLA-258  | 14          | PNET                   | +        | Type III    | Post-therapy     | Progressive Disease |
| COG-E-352 | 17          | PNET                   | -        | EWS-ERG     | Post-therapy     | Recurrence          |
| Hs919.T   | 34          | Benign Osteoid Osteoma | -        | None        | -                | -                   |

Data related to 5 ESFT cell lines comprised of both EWS-FLI1 and EWS-ERG oncogenic fusions and Hs919.T a benign bone tumor control cell line utilized in this study.

**Supplementary Table 2: ESFT cell line derived sEV proteomic data.** See Supplementary Table 2

**Supplementary Table 3: Analysis of ESFT cell line derived sEV proteomic data.** See Supplementary Table 3

**Supplementary Table 4: Differential protein expression comparisons in ESFT sEVs.** See Supplementary Table 4

**Supplementary Table 5: Gene Set Enrichment Analysis (GSEA) comparison of EWS-FLI1 sEV and EWS-ERG sEV proteome.** See Supplementary Table 5

**Supplementary Table 6: Proteins enriched in ESFT sEV sample**

| Symbol  | Name                                                               | Symbol  | Name                                                                                                   |
|---------|--------------------------------------------------------------------|---------|--------------------------------------------------------------------------------------------------------|
| ACTG1   | actin gamma 1                                                      | HSPA5   | heat shock 70kDa protein 5 (glucose-regulated protein, 78kDa)                                          |
| ACTR3   | ARP3 actin-related protein 3 homolog (yeast)                       | HSPA8   | heat shock 70kDa protein 8                                                                             |
| ALDOA   | aldolase A, fructose-bisphosphate                                  | HSPD1   | heat shock 60kDa protein 1 (chaperonin)                                                                |
| ALDOC   | aldolase C, fructose-bisphosphate                                  | HUWE1   | HECT, UBA and WWE domain containing 1, E3 ubiquitin protein ligase                                     |
| ANXA1   | annexin A1                                                         | ITGA5   | integrin, alpha 5 (fibronectin receptor, alpha polypeptide)                                            |
| ANXA2   | annexin A2                                                         | ITGB1   | integrin, beta 1 (fibronectin receptor, beta polypeptide, antigen CD29 includes MDF2, MSK12)           |
| ANXA5   | annexin A5                                                         | JAK1    | Janus kinase 1                                                                                         |
| ARHGDIA | Rho GDP dissociation inhibitor (GDI) alpha                         | KRT1    | keratin 1, type II                                                                                     |
| BSG     | basigin (Ok blood group)                                           | KRT14   | keratin 14, type I                                                                                     |
| CALR    | calreticulin                                                       | KRT9    | keratin 9, type I                                                                                      |
| CAV1    | caveolin 1, caveolae protein, 22kDa                                | MYH9    | myosin, heavy chain 9, non-muscle                                                                      |
| CD99    | CD99 molecule                                                      | NGFR    | nerve growth factor receptor                                                                           |
| CTNNA1  | catenin (cadherin-associated protein), alpha 1, 102kDa             | NPM1    | nucleophosmin (nucleolar phosphoprotein B23, numatrin)                                                 |
| CTNNB1  | catenin (cadherin-associated protein), beta 1, 88kDa               | PDIA3   | protein disulfide isomerase family A, member 3                                                         |
| EIF2S1  | eukaryotic translation initiation factor 2, subunit 1 alpha, 35kDa | PFN1    | profilin 1                                                                                             |
| ENO1    | enolase 1, (alpha)                                                 | PHB     | prohibitin                                                                                             |
| ENO2    | enolase 2 (gamma, neuronal)                                        | PKM     | pyruvate kinase, muscle                                                                                |
| EZR     | ezrin                                                              | PLG     | plasminogen                                                                                            |
| F2      | coagulation factor II (thrombin)                                   | PRDX1   | peroxiredoxin 1                                                                                        |
| FASN    | fatty acid synthase                                                | SLC16A1 | solute carrier family 16 (monocarboxylate transporter), member 1                                       |
| FLNA    | filamin A, alpha                                                   | SLC7A5  | solute carrier family 7 (amino acid transporter light chain, L system), member 5                       |
| FLNC    | filamin C, gamma                                                   | STMN1   | stathmin 1                                                                                             |
| FSCN1   | fascin actin-bundling protein 1                                    | TFRC    | transferrin receptor                                                                                   |
| FTH1    | ferritin, heavy polypeptide 1                                      | THBS1   | thrombospondin 1                                                                                       |
| GAPDH   | glyceraldehyde-3-phosphate dehydrogenase                           | TLN1    | talin 1                                                                                                |
| GSTP1   | glutathione S-transferase pi 1                                     | TP11    | triosephosphate isomerase 1                                                                            |
| H2AFX   | H2A histone family, member X                                       | TPM3    | tropomyosin 3                                                                                          |
| HINT1   | histidine triad nucleotide binding protein 1                       | UCHL1   | ubiquitin carboxyl-terminal esterase L1 (ubiquitin thiolesterase)                                      |
| HLA-A   | major histocompatibility complex, class I, A                       | VCL     | vinculin                                                                                               |
| HNRNPH1 | heterogeneous nuclear ribonucleoprotein H1 (H)                     | XRCC5   | X-ray repair complementing defective repair in Chinese hamster cells 5 (double-strand-break rejoining) |
| HSPA4   | heat shock 70kDa protein 4                                         | YWHAG   | tyrosine 3-monooxygenase/tryptophan 5-monooxygenase activation protein, gamma                          |

A total of 62 potential ESFT biomarker candidates were identified, which included both CD99/MIC2 and HINT1 in the ESFT sEV proteome.

### Supplementary Table 7: ESFT sEV proteins with biomarker applications

| Protein Symbol | Gene                                         | Location        | Application                                   |
|----------------|----------------------------------------------|-----------------|-----------------------------------------------|
| HINT1          | Histidine triad nucleotide binding protein 1 | Intracellular   | Prognosis                                     |
| CAV1           | Caveolin 1                                   | Plasma Membrane | Diagnosis                                     |
| NPM1           | Nucleolar phosphoprotein B23                 | Intracellular   | Disease Progression                           |
| CTNNB1         | Cadherin-associated protein beta 1           | Intracellular   | Diagnosis<br>Disease Progression<br>Prognosis |
| ENO2           | Enolase 2                                    | Intracellular   | Diagnosis<br>Prognosis                        |
| EZR            | Ezrin                                        | Plasma Membrane | Prognosis                                     |
| ITGA5          | Integrin, alpha 5                            | Plasma Membrane | Prognosis                                     |
| JAK1           | Janus kinase 1                               | Intracellular   | Efficacy                                      |
| CD99           | CD99 molecule                                | Plasma Membrane | Diagnosis                                     |
| NGFR           | Nerve growth factor receptor                 | Plasma Membrane | Disease Progression<br>Prognosis              |

A total of 10 proteins previously identified to be associated with sarcomas were further investigated. 4 of the 10 proteins had been previously identified as diagnostic biomarker potential in sarcomas, while 6 of the 10 proteins were identified as prognostic biomarker potential in sarcomas.

### Supplementary Table 8: Antibodies

| Antibodies               | Isotype | Source            |
|--------------------------|---------|-------------------|
| CD99 (1C3)               | Rabbit  | Thermo Fisher     |
| NGFR (D4B3)              | Rabbit  | Cell Signaling    |
| HINT1                    | Rabbit  | ORIGENE           |
| ITGA5                    | Rabbit  | Cell Signaling    |
| JAK1                     | Rabbit  | Thermo Scientific |
| CTNNB1 (14/Beta-Catenin) | Mouse   | BD Biosciences    |
| EZR (3C12)               | Mouse   | Sigma Aldrich     |
| ENO                      | Rabbit  | Cell Signaling    |
| NPM1 (NA24)              | Mouse   | Santa Cruz        |
| $\beta$ -actin (AC-15)   | Mouse   | Sigma Aldrich     |

10 antibodies utilized for immunoblot analysis in ESFT sEV samples.
